# Supplementary material
Source: PubMed Central journal article supplement (PMC3263763)
Supplement: NIHMS344780-supplement-01.pdf [file NIHMS344780-supplement-01.pdf]

Supplementary Table 1. Unadjusted Outcomes Stratified by RACHS-1 Category

| <b>RACHS-1 Category 1</b>   | <b>Overall</b> | <b>No Aprotinin</b> | <b>Aprotinin</b> | <b>p</b> |
|-----------------------------|----------------|---------------------|------------------|----------|
| Mortality                   | 20 (0.78)      | 8 (0.4)             | 12 (1.7)         | <0.001   |
| Dialysis                    | 4 (0.2)        | 2 (0.1)             | 2 (0.3)          | 0.302    |
| Total length of stay        | 3 [3, 5]       | 3 [3, 5]            | 4 [3, 5]         | <0.001   |
| ICU length of stay          | 1 [1, 3]       | 1 [1, 2]            | 2 [1, 3]         | 0.205    |
| <b>RACHS-1 Category 2</b>   |                |                     |                  |          |
| Mortality                   | 124 (1.1)      | 77 (1.2)            | 47 (1.0)         | 0.272    |
| Dialysis                    | 33 (0.3)       | 20 (0.3)            | 13 (0.3)         | 0.695    |
| Total length of stay        | 5 [4, 10]      | 6 [4, 10]           | 5 [4, 9]         | 0.250    |
| ICU length of stay          | 3 [1, 5]       | 3 [1, 5]            | 3 [1, 5]         | 0.079    |
| <b>RACHS-1 Category 3</b>   |                |                     |                  |          |
| Mortality                   | 318 (2.7)      | 190 (3.0)           | 128 (2.3)        | 0.019    |
| Dialysis                    | 126 (1.1)      | 60 (0.9)            | 66 (1.2)         | 0.203    |
| Total length of stay        | 9 [5, 17]      | 9 [5, 18]           | 8 [5, 16]        | 0.002    |
| ICU length of stay          | 4 [2, 8]       | 4 [2, 8]            | 4 [2, 7]         | 0.014    |
| <b>RACHS-1 Category 4</b>   |                |                     |                  |          |
| Mortality                   | 237 (7.4)      | 118 (7.2)           | 119 (7.6)        | 0.609    |
| Dialysis                    | 83 (2.6)       | 41 (2.5)            | 42 (2.7)         | 0.714    |
| Total length of stay        | 15 [9, 28]     | 16 [9, 28]          | 15 [8, 28]       | 0.106    |
| ICU length of stay          | 7 [2, 13]      | 6 [2, 13]           | 7 [2, 14]        | 0.054    |
| <b>RACHS-1 Category 5/6</b> |                |                     |                  |          |
| Mortality                   | 265 (16.8)     | 139 (16.9)          | 126 (16.6)       | 0.878    |
| Dialysis                    | 85 (5.37)      | 38 (4.62)           | 47 (6.19)        | 0.165    |
| ICU length of stay          | 26 [17, 43]    | 26 [17, 45]         | 26 [17, 43]      | 0.455    |
| ICU length of stay          | 13 [6, 24]     | 13 [6, 25]          | 13 [6, 24]       | 0.945    |

Data are displayed as n (%) for dichotomous variables and median (IQR) for continuous variables.
